# Supplementary material for: Dual‐Specificity Phosphatase 26 Protects Against Cardiac Hypertrophy Through TAK1
Source: PubMed Central journal article supplement — J Am Heart Assoc. 2021 Jan 30;10(4):e014311. doi: 10.1161/JAHA.119.014311 (PMC7955340; doi:10.1161/jaha.119.014311), 2021-01-30

# **Supplemental Material**

**Table S1. qPCR primers used for mRNA expression analysis.**

| Gene name                            | Forward primer (mouse) | Reverse primer (mouse)   |
|--------------------------------------|------------------------|--------------------------|
| <i>Dusp26</i>                        | ATGCCCTCTGTTACCATCC    | CTGTTGTGTGAGGCGTTGAG     |
| <i>Anp</i>                           | TCGGAGCCTACGAAGATCCA   | TTCGGTACCGGAAGCTGTTG     |
| <i>Bnp</i>                           | GAAGGACCAAGGCCTCACAA   | TTCAGTGC GTTACAGCCCAA    |
| <i>Myh7</i>                          | CAACCTGTCCAAGTTCCGCA   | TACTCCTCATT CAGGCCCTTG   |
| <i>Collagen 1<math>\alpha</math></i> | TGCTAACGTGGTTCGTGACCGT | ACATCTTGAGGTCGCGGCATGT   |
| <i>Collagen III</i>                  | ACGTAAGCACTGGTGGACAG   | CCGGCTGGAAAGAAGTCTGA     |
| <i>Ctgf</i>                          | TGACCCCTGCGACCCACA     | TACACCGACCCACCGAAGACACAG |
| <i>Gapdh</i>                         | ACTCCA CT CACGGCAAATTC | TCTCCATGGTGGTGAAGACA     |

| Gene name    | Forward primer (rat)      | Reverse primer (rat)   |
|--------------|---------------------------|------------------------|
| <i>Anp</i>   | AAAGCAA ACTGAGGGCTCTGCTCG | TTCGGTACCGGAAGCTGTTGCA |
| <i>Myh7</i>  | AGTTCGGGCGAGTCAAAGATG     | CAGGTTGTCTTGTTCCGCCT   |
| <i>Gapdh</i> | TGTGAACGGATTTGGCCCTA      | GATGGTGATGGGTTTCCCGT   |

**Table S2. Antibodies used for Western blot analysis.**

| Antibody | Manufacturer | Catalogue number | Source of species | Dilution |
|----------|--------------|------------------|-------------------|----------|
| DUSP26   | GENETEX      | GTX109283        | rabbit            | 1:1000   |
| p-TAK1   | CST          | 4531             | rabbit            | 1:1000   |
| TAK1     | CST          | 5206             | rabbit            | 1:1000   |
| p-ERK    | CST          | 4370             | rabbit            | 1:1000   |
| ERK      | CST          | 4695             | rabbit            | 1:1000   |
| P-JNK    | CST          | 4668             | rabbit            | 1:1000   |
| JNK      | CST          | 9252             | rabbit            | 1:1000   |
| p-p38    | CST          | 4511             | rabbit            | 1:1000   |
| p38      | CST          | 9212             | rabbit            | 1:1000   |
| Flag     | MBL          | M185             | mouse             | 1:2000   |
| HA       | MBL          | M180-3           | mouse             | 1:2000   |
| GAPDH    | CST          | 2118             | rabbit            | 1:5000   |

**Table S3. Primers used for plasmid constructs.**

| Gene name               | Primer sequence (5'-3') |                                                                   |
|-------------------------|-------------------------|-------------------------------------------------------------------|
| phage-FLAG-DUSP26       | F                       | TCGGGTTTAAACGGATCCATGTGCCCTGGTAACTGGCT<br>TTGG                    |
|                         | R                       | GGGCCCTCTAGACTCGAGTCATGCTTCCAGACCCTGCC<br>GC                      |
| pLKO.1-rat-DUSP26-shRNA | F                       | CCGGCAATGTCTTTGAGTTGGAAAG CTCGAG<br>CTTTCCAAC TCAAAGACATTG TTTTGG |
|                         | R                       | AATTCAAAAACAATGTCTTTGAGTTGGAAAG CTCGAG<br>CTTTCCAAC TCAAAGACATTG  |
| HA-TAK1                 | F                       | CGCGGATCCATGTCTACAGCCTCTGCCG                                      |
|                         | R                       | CCGCTCGAGTCATGAAGTGCCTTGTCGTTTC                                   |

Figure S1. A-C, Mice heart rates in the process of echocardiographic examination in indicated groups.

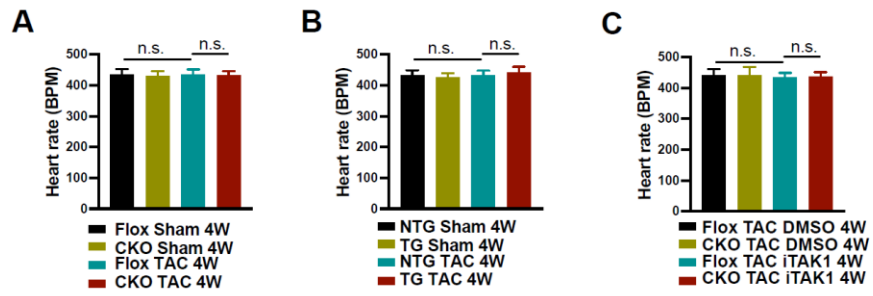

Supplement: JAH3-10-e014311-s001.pdf [file JAH3-10-e014311-s001.pdf]
